# Supplementary material for: The long non-coding RNA NEAT1 is a ΔNp63 target gene modulating epidermal differentiation
Source: PubMed Central journal article supplement (PMC10293300; doi:10.1038/s41467-023-39011-5), 2023-06-26
Supplement: 41467_2023_39011_MOESM3_ESM.pdf [file 41467_2023_39011_MOESM3_ESM.pdf]

## Reporting Summary

Nature Portfolio wishes to improve the reproducibility of the work that we publish. This form provides structure for consistency and transparency in reporting. For further information on Nature Portfolio policies, see our [Editorial Policies](#) and the [Editorial Policy Checklist](#).

### Statistics

For all statistical analyses, confirm that the following items are present in the figure legend, table legend, main text, or Methods section.

n/a Confirmed

- The exact sample size ( $n$ ) for each experimental group/condition, given as a discrete number and unit of measurement
- A statement on whether measurements were taken from distinct samples or whether the same sample was measured repeatedly
- The statistical test(s) used AND whether they are one- or two-sided  
*Only common tests should be described solely by name; describe more complex techniques in the Methods section.*
- A description of all covariates tested
- A description of any assumptions or corrections, such as tests of normality and adjustment for multiple comparisons
- A full description of the statistical parameters including central tendency (e.g. means) or other basic estimates (e.g. regression coefficient) AND variation (e.g. standard deviation) or associated estimates of uncertainty (e.g. confidence intervals)
- For null hypothesis testing, the test statistic (e.g.  $F$ ,  $t$ ,  $r$ ) with confidence intervals, effect sizes, degrees of freedom and  $P$  value noted  
*Give  $P$  values as exact values whenever suitable.*
- For Bayesian analysis, information on the choice of priors and Markov chain Monte Carlo settings
- For hierarchical and complex designs, identification of the appropriate level for tests and full reporting of outcomes
- Estimates of effect sizes (e.g. Cohen's  $d$ , Pearson's  $r$ ), indicating how they were calculated

*Our web collection on [statistics for biologists](#) contains articles on many of the points above.*

### Software and code

Policy information about [availability of computer code](#)

Data collection

Images: Leica Stellaris 8 , NIKON A1 and Leica DM6  
Western blotting: Uvitec Alliance Q9  
qPCR: Applied Biosystem QuanStudio 5 Real-Time PCR system

Data analysis

Leica Application Suite x (LASX)  
NIKON NIS Elements software A1  
UVITEC Nine Alliance software  
Graph Pad Prism 8.0  
IGV\_2.11.2  
Applied Biosystem QuanStudio Design and Analysis software  
Image J software 1.53a  
VENN (<http://www.interactivenn.net>)  
ChIRP-seq data were analyzed with "chipseq" version 1.2.2 pipeline included into the nf-core platform (<https://nf-co.re/chipseq>) with default parameters (Ewels et al 2020) (doi: 10.5281/zenodo.3240506);  
ShinyGO version 0.76 (Ge et al 2020);  
ComplexHeatmap R package (Gu et al 2016);  
DoRothEA software (Garcia-Alonso et al., 2019);  
GREAT tool (Regions Enrichment of Annotations Tool) (Mclean et al., 2010);  
RNA-seq data were analyzed with "rnaseq" version 3.3 pipeline included into the nf-core platform (<https://nfco.re/rnaseq>) with default parameters (Ewels et al., 2020) (doi:10.5281/zenodo.5550247);  
DESeq2 package (Love et al., 2014);

IPA tool (Kramer et al, 2014);  
 Limma library;  
 Regions Enrichment of Annotations Tool (GREAT) (McLean et al, 2010);  
 MEME algorithm (Bailey et al, 2015);  
 EnhancedVolcano R package;  
 Intervene software (Khan & Mathelier, 2017);  
 IPA tools (Kramer et al., 2014);

For manuscripts utilizing custom algorithms or software that are central to the research but not yet described in published literature, software must be made available to editors and reviewers. We strongly encourage code deposition in a community repository (e.g. GitHub). See the Nature Portfolio [guidelines for submitting code & software](#) for further information.

## Data

Policy information about [availability of data](#)

All manuscripts must include a [data availability statement](#). This statement should provide the following information, where applicable:

- Accession codes, unique identifiers, or web links for publicly available datasets
- A description of any restrictions on data availability
- For clinical datasets or third party data, please ensure that the statement adheres to our [policy](#)

All sequencing data that support the findings of this study have been deposited in the National Center for Biotechnology Information Gene Expression Omnibus (GEO) under the Series accession number GSE205961. This Series includes the access to RNA-seq data (GSE205960) ChIP-seq data (GSE205959) and lncRNAs microarray (GSE232654). Public ChIP-seq was downloaded from GEO database under the accession number GSM1446927. Public RNA-seq data were downloaded from GEO database under the accession numbers GSM1446880 and GSM1446883. Public lamellas Ichthyosis and psoriasis microarray data were downloaded from GEO database under the accession numbers GSE108640 and GSE13555, respectively. Public ALOX12B knock-out mice microarray data were downloaded from GEO database under the accession number (GSE127435). Source data are provided with this paper.

## Human research participants

Policy information about [studies involving human research participants and Sex and Gender in Research](#).

|                             |     |
|-----------------------------|-----|
| Reporting on sex and gender | N/A |
| Population characteristics  | N/A |
| Recruitment                 | N/A |
| Ethics oversight            | N/A |

Note that full information on the approval of the study protocol must also be provided in the manuscript.

## Field-specific reporting

Please select the one below that is the best fit for your research. If you are not sure, read the appropriate sections before making your selection.

Life sciences       Behavioural & social sciences       Ecological, evolutionary & environmental sciences

For a reference copy of the document with all sections, see [nature.com/documents/nr-reporting-summary-flat.pdf](https://www.nature.com/documents/nr-reporting-summary-flat.pdf)

## Life sciences study design

All studies must disclose on these points even when the disclosure is negative.

|                 |                                                                                                                                                                                                                                                                                                                                                  |
|-----------------|--------------------------------------------------------------------------------------------------------------------------------------------------------------------------------------------------------------------------------------------------------------------------------------------------------------------------------------------------|
| Sample size     | No statistical methods were used to determine the sample size. Sample sizes were chose as large as possible to yield high statistical significance.                                                                                                                                                                                              |
| Data exclusions | No samples were excluded.                                                                                                                                                                                                                                                                                                                        |
| Replication     | All experiments were repeated to assure reproducibility (the number of biological replicates per experiment varied and it is mentioned in the figure legends). All attempts for replication shows similar results.                                                                                                                               |
| Randomization   | For drug treatments, samples were allocated into each group randomly. In each imaging session, samples were acquired selecting randomly approximately the same number of images for each condition in order to control for any variance. There are no other experiments that require randomization and therefore no randomization was performed. |
| Blinding        | For paraspeckles and ki67 positive cells counts, and corneo thickness measurement, the researcher was single-blinded during imaging acquisition and analysis. For others experiments, no blinding was used as there are no handling steps that are realistically subject to researcher bias.                                                     |
